# Supplementary material for: β-Neurexin Is a Ligand for the Staphylococcus aureus MSCRAMM SdrC
Source: PubMed Central journal article supplement (PMC2800189; doi:10.1371/journal.ppat.1000726), 2010-01-15

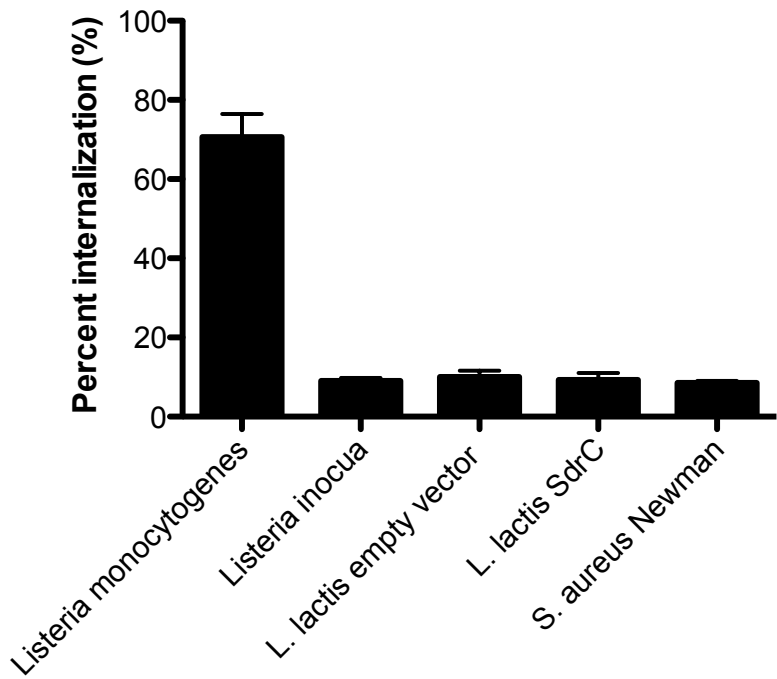

Supplement: ppat.1000726.s002.pdf [file ppat.1000726.s002.pdf]
