# Supplementary material for: β-Neurexin Is a Ligand for the Staphylococcus aureus MSCRAMM SdrC
Source: PLoS Pathog. 2010 Jan 15;6(1):e1000726. doi: 10.1371/journal.ppat.1000726 (PMC2800189; doi:10.1371/journal.ppat.1000726)
Supplement: Table S1 — Pattern search results (0.06 MB PDF) [file ppat.1000726.s001.pdf]

## Supplementary tables

**Table S1.** Pattern search results

a. Zero mismatch

| Protein         | Accession number | Sequence  | Predicted localization of the sequence |
|-----------------|------------------|-----------|----------------------------------------|
| Neurexin 1 beta | NP_620072        | AHHIHFFHG | extracellular                          |

b. One mismatch

| Protein         | Accession number | Sequence  | Predicted localization of the sequence |
|-----------------|------------------|-----------|----------------------------------------|
| -               | NP_620072        | AHHIHFFHG | extracellular                          |
| Neurexin 2 beta | NP_620063        | THHVHFFHS | extracellular                          |

c. Two mismatches

| Protein                                                   | Accession number | Sequence  | Predicted localization of the sequence |
|-----------------------------------------------------------|------------------|-----------|----------------------------------------|
| Neurexin 1 beta                                           | NP_620072        | AHHIHFFHG | extracellular                          |
| Neurexin 2 beta                                           | NP_620063        | THHVHFFHS | extracellular                          |
| Neurexin 3 beta                                           | NP_620063        | QHEHFFHG  | extracellular                          |
| Voltage dependent T-type calcium channel alpha 1I subunit | NP_66919.2       | AHHIHG    | extracellular                          |
